# Supplementary material
Source: HighWire-hosted journal article supplement (https://www.jrheum.org/highwire/filestream/38258/field_highwire_adjunct_files/0/190981DataSuppl.pdf)
Supplement: 190981DataSuppl.pdf [file 190981DataSuppl.pdf]

## ONLINE SUPPLEMENTARY MATERIAL

**Supplementary Table 1.** Relation of PFOA categories (based on PF symptoms and MRI PFOA) with depressive symptoms, pain catastrophizing, and temporal summation (frequency of outcome (%), and odds ratios with 95% confidence intervals~).

|                                | Depressive symptoms    |                           | Catastrophizing        |                           | TS (patella)           |                           | TS (wrist)             |                           |
|--------------------------------|------------------------|---------------------------|------------------------|---------------------------|------------------------|---------------------------|------------------------|---------------------------|
|                                | (n=1112 <sup>^</sup> ) |                           | (n=1112 <sup>^</sup> ) |                           | (n=1074 <sup>^</sup> ) |                           | (n=1097 <sup>^</sup> ) |                           |
|                                | Frequency              | Adjusted OR<br>(95% CI)   | Frequency              | Adjusted OR<br>(95% CI)   | Frequency              | Adjusted OR<br>(95% CI)   | Frequency              | Adjusted OR<br>(95% CI)   |
| PF symptoms + MRI PFOA         | 22/142 (15.5)          | <b>2.01 (1.13, 3.56)*</b> | 78/142 (54.9)          | <b>1.50 (1.03, 2.19)*</b> | 63/134 (47)            | <b>1.71 (1.15, 2.53)*</b> | 57/140 (40.7)          | 1.27 (0.86, 1.88)         |
| PF symptoms only (no MRI OA)   | 25/177 (14.1)          | <b>1.79 (1.04, 3.09)*</b> | 102/177 (57.6)         | <b>1.79 (1.26, 2.54)*</b> | 84/171 (49.1)          | <b>1.96 (1.37, 2.80)*</b> | 80/174 (46.0)          | <b>1.66 (1.16, 2.37)*</b> |
| MRI PFOA only (no PF symptoms) | 10/214 (4.7)           | 0.62 (0.30, 1.28)         | 103/214 (48.1)         | 1.26 (0.91, 1.73)         | 66/210 (31.4)          | 0.87 (0.62, 1.23)         | 70/214 (32.7)          | 0.87 (0.62, 1.22)         |
| No PFOA                        | 42/579 (7.3)           | 1                         | 238/579 (41.1)         | 1                         | 193/559 (34.5)         | 1                         | 204/569 (35.9)         | 1                         |

Reference group: no PFOA (no PF symptoms or MRI PFOA). \* indicates significant effect (p<0.05).

~Adjusted for age, sex, body mass index, presence of tibiofemoral full thickness cartilage lesions, and presence of tibiofemoral bone marrow lesions

<sup>^</sup>Total number of observations used for each analysis, based on missing values for outcome

TS, temporal summation; TF, tibiofemoral

**Supplementary Table 2.** Mean (95% confidence intervals) pressure pain threshold measures at the patella and wrist for each PFOA classification (kg/cm<sup>2</sup>), split by sex.

|                                | Males                 |                       | Females               |                       |
|--------------------------------|-----------------------|-----------------------|-----------------------|-----------------------|
|                                | Patella               | Wrist                 | Patella               | Wrist                 |
|                                | (n=382 <sup>^</sup> ) | (n=391 <sup>^</sup> ) | (n=680 <sup>^</sup> ) | (n=689 <sup>^</sup> ) |
| PF symptoms + MRI PFOA         | 5.87 (4.98 to 6.77)   | 3.82 (3.23 to 4.42)   | 4.27 (3.92 to 4.63)   | 2.89 (2.68 to 3.1)    |
| PF symptoms only (no MRI PFOA) | 4.71 (4.02 to 5.4)    | 3.26 (2.78 to 3.74)   | 4.55 (4.22 to 4.88)   | 3.13 (2.93 to 3.32)   |
| MRI PFOA only (no PF symptoms) | 6.03 (5.54 to 6.52)   | 3.63 (3.3 to 3.96)    | 4.86 (4.53 to 5.19)   | 3.27 (3.07 to 3.47)   |
| No PFOA <sup>#</sup>           | 6.08 (5.78 to 6.37)   | 3.97 (3.77 to 4.17)   | 4.54 (4.34 to 4.75)   | 3 (2.88 to 3.12)      |
| <b><i>P value</i></b>          | <b>0.002*</b>         | 0.076                 | <b>0.005*</b>         | 0.075                 |

<sup>#</sup> no PF symptoms or MRI PFOA. \* indicates significant effect (p<0.05).

<sup>~</sup>Adjusted for age, body mass index, presence of tibiofemoral full thickness cartilage lesions, and presence of tibiofemoral bone marrow lesions

<sup>^</sup>Total number of observations used for each analysis, based on missing values for outcome
